# Supplementary material for: Effective Prognostic Model for Therapy Response Prediction in Acute Myeloid Leukemia Patients
Source: MDPI journal article supplement (doi:10.3390/jpm13081234), 2023-08-07
Supplement: s1 [file s1]

Table S1. Age distribution of AML patients (n=53).

| Age, years | Abs. | %    |
|------------|------|------|
| 18-19      | 1    | 1.9  |
| 20-29      | 4    | 7.5  |
| 30-39      | 7    | 13.2 |
| 40-49      | 7    | 13.2 |
| 50-59      | 18   | 34   |
| 60-69      | 12   | 22.6 |
| 70-79      | 4    | 7.6  |
| Total      | 53   | 100  |

Table S2. Gender distribution of AML patients (n=53).

| Total number of patients |     | Male |      | Female |      |
|--------------------------|-----|------|------|--------|------|
| Abs.                     | %   | Abs. | %    | Abs.   | %    |
| 53                       | 100 | 25   | 47.2 | 28     | 52.8 |

Table S3. Distribution of AML patients according the presence of lymphadenopathy (n=53).

| Lymphadenopathy             | Total |     | Men  |      | Women |      |
|-----------------------------|-------|-----|------|------|-------|------|
|                             | Abs.  | %   | Abs. | %    | Abs.  | %    |
| Presence of lymphadenopathy | 9     | 17  | 4    | 7.6  | 5     | 9.4  |
| Absence of lymphadenopathy  | 44    | 83  | 21   | 39.6 | 23    | 43.4 |
| Total                       | 53    | 100 | 25   | 47.2 | 28    | 52.8 |

Table S4. Distribution of AML patients according the presence and structure of extranodal diseases (n=53).

| Extranodal diseases             | Abs. | %    |
|---------------------------------|------|------|
| Presence of extranodal diseases | 36   | 67.9 |
| Liver                           | 30   | 56.6 |
| Lungs                           | 5    | 9.4  |
| Skin                            | 1    | 1.9  |

|                                |    |      |
|--------------------------------|----|------|
| Absence of extranodal diseases | 17 | 32.1 |
| Total                          | 53 | 100  |

Table S5. The structure of clinical syndromes in AML patients (n=53).

| Clinical syndrome | Abs. | %    |
|-------------------|------|------|
| Hemorrhagic       | 42   | 79.2 |
| Anemic            | 50   | 94.3 |
| Infectious        | 27   | 50.9 |
| Hyperplastic      | 35   | 66   |
| Intoxication      | 46   | 86.8 |
| Total             | 53   | 100  |

Table S6. Parameters of peripheral blood in AML patients before treatment start (n=53).

| Parameter (reference values)                                        | MEAN ± SEM  | Presence in patients |      |
|---------------------------------------------------------------------|-------------|----------------------|------|
|                                                                     |             | Abs.                 | %    |
| Normal hemoglobin (Hb = 120-170 g/L)                                | 143.3±27    | 3                    | 5.6  |
| Mild anemia (Hb = 120-90 g/L)                                       | 101.2±7.3   | 18                   | 34   |
| Moderate anemia (Hb = 90-70 g/L)                                    | 80.1±6.5    | 18                   | 34   |
| Severe anemia (Hb < 70 g/L)                                         | 55.9±8.5    | 14                   | 26.3 |
| Normal platelets, 10 <sup>9</sup> /L (150-400 × 10 <sup>9</sup> /L) | 213.6±59.4  | 7                    | 13.2 |
| Thrombocytosis (platelets > 400 × 10 <sup>9</sup> /L)               | 549±9.9     | 2                    | 3.8  |
| Thrombocytopenia (platelets < 150 × 10 <sup>9</sup> /L)             | 35.1±28.8   | 44                   | 83   |
| Normal leukocytes (4-9 × 10 <sup>9</sup> /L)                        | 6±1.5       | 7                    | 13.2 |
| Leukopenia (leukocytes < 4 × 10 <sup>9</sup> /L)                    | 2±0.5       | 8                    | 15.1 |
| Leukocytosis (leukocytes 9-100 × 10 <sup>9</sup> /L)                | 44.3±26.4   | 26                   | 49.1 |
| Hyperleukocytosis (leukocytes > 100 × 10 <sup>9</sup> /L)           | 182.4±119.5 | 12                   | 22.6 |
| Blasts, %                                                           | 55.7±29.3   | 42                   | 79.2 |

Table S7. AML risk stratification by genetics\*. Patient distribution (n=43).

| Risk category | Genetic abnormality                                                                                                                                                                                                                                                                                                                                                                               | Total number |      | Male |      | Female |      |
|---------------|---------------------------------------------------------------------------------------------------------------------------------------------------------------------------------------------------------------------------------------------------------------------------------------------------------------------------------------------------------------------------------------------------|--------------|------|------|------|--------|------|
|               |                                                                                                                                                                                                                                                                                                                                                                                                   | Abs          | %    | Abs  | %    | Abs    | %    |
| Favorable     | t(8;21)(q22;q22.1) / <i>RUNX1-RUNX1T1</i><br>inv(16)(p13.1q22) or t(16;16)(p13.1;q22) / <i>CBFB-MYH11</i><br>Mutated <i>NPM1</i> without <i>FLT3-ITD</i><br>Mutated <i>CEBPA</i> (double)                                                                                                                                                                                                         | 23           | 53.5 | 15   | 34.9 | 8      | 18.6 |
| Intermediate  | Mutated <i>NPM1</i> with <i>FLT3-ITD</i><br>Wild-type <i>NPM1</i> with <i>FLT3-ITD</i> (without adverse-risk genetic lesions)<br>t(9;11)(p21.3;q23.3) / <i>MLLT3-KMT2A</i><br>Cytogenetic and/or molecular abnormalities not classified as favorable or adverse                                                                                                                                   | 5            | 11.6 | 2    | 4.6  | 3      | 7    |
| Adverse       | t(6;9)(p23;q34.1) / <i>DEK-NUP214</i><br>t(v;11q23.3) / <i>KMT2A</i> rearranged<br>t(9;22)(q34.1;q11.2) / <i>BCR-ABL1</i><br>inv(3)(q21.3q26.2) or t(3;3)(q21.3;q26.2) / <i>GATA2, MECOM(EVI1)</i><br>-5 or del(5q); -7; -17/abn(17p)<br>Complex karyotype, monosomal karyotype<br>Mutated <i>ASXL1, BCOR, EZH2, RUNX1, SF3B1, SRSF2, STAG2, U2AF1</i> and/or <i>ZRSR2</i><br>Mutated <i>TP53</i> | 15           | 34.9 | 5    | 11.6 | 10     | 23.3 |
| Total         |                                                                                                                                                                                                                                                                                                                                                                                                   | 43           | 100  | 22   | 51.1 | 21     | 48.9 |

\*2022 European LeukemiaNet risk stratification by genetics [1].

1. Döhner, H.; Wei, A.H.; Appelbaum, F.R.; Craddock, C.; DiNardo, C.D.; Dombret, H.; Ebert, B.L.; Fenaux, P.; Godley, L.A.; Hasserjian, R.P.; et al. Diagnosis and management of AML in adults: 2022 recommendations from an international expert panel on behalf of the ELN. *Blood* 2022, *140*, 1345–1377, doi:10.1182/BLOOD.2022016867.



Table S8. AML prognosis stratification by cytogenetic/molecular markers and clinical characteristics. Patient distribution (n=53).

| Prognosis category | Cytogenetic markers                                                                                                                                                                    | Molecular markers                                                                                                                                                                                                                                                                                   | Clinical factors                                                                                                                                                                                                                                                                                                  | Total number |      | Male |      | Female |      |
|--------------------|----------------------------------------------------------------------------------------------------------------------------------------------------------------------------------------|-----------------------------------------------------------------------------------------------------------------------------------------------------------------------------------------------------------------------------------------------------------------------------------------------------|-------------------------------------------------------------------------------------------------------------------------------------------------------------------------------------------------------------------------------------------------------------------------------------------------------------------|--------------|------|------|------|--------|------|
|                    |                                                                                                                                                                                        |                                                                                                                                                                                                                                                                                                     |                                                                                                                                                                                                                                                                                                                   | Abs          | %    | Abs  | %    | Abs    | %    |
| Favorable          | t(8;21)(q22;q22)<br>inv(16)(p13.1;q22) or<br>t(16;16)(p13.1;q22)<br>t(15;17)                                                                                                           | Mutated <i>CEBPA</i><br>(double)<br>Mutated <i>NPM1</i><br>(without <i>FLT3</i> -ITD<br>mutation) with normal<br>karyotype                                                                                                                                                                          | MRD-negative                                                                                                                                                                                                                                                                                                      | 10           | 18.9 | 5    | 9.4  | 5      | 9.4  |
| Unfavorable        | inv(3)(q21;q26.2) or<br>t(3;3)(q21;q26.2)<br>t(9;22)<br>t(9;11)<br>t(v;11)(v;q23)<br>t(6;9)(p23;q34)<br>-5 or del(5q)<br>-7<br>abn(17p)<br>Complex karyotype<br>Monosomal<br>karyotype | Enhanced <i>Evi-1</i><br>expression<br><i>MLL</i> rearrangements<br><i>FLT3</i> -ITD mutation<br><i>DNMT3A</i> mutation<br><i>BAALC</i> expression<br><i>ERG</i> expression<br><i>MN1</i> expression<br><i>WT1</i> polymorphism<br><i>BCR-ABL</i> -positive<br>c-kit mutation for t(8;21)<br>inv 16 | Secondary AML<br>Increased age (>60<br>years; for inv(16) >35<br>years)<br>Elevated WBC count<br>(>100×10 <sup>9</sup> /L; for t(8;21)<br>>20×10 <sup>9</sup> /L)<br>Extramedullary disease<br>No early complete<br>remission<br>Persistent MRD<br>CD34 <sup>+</sup> blasts<br>M0 according FAB<br>classification | 43           | 81.1 | 20   | 37.7 | 23     | 43.4 |
| Total              |                                                                                                                                                                                        |                                                                                                                                                                                                                                                                                                     |                                                                                                                                                                                                                                                                                                                   | 53           | 100  | 25   | 47.2 | 28     | 52.8 |

MRD – measurable residual disease

Table S9. Distribution of AML patients according to the therapy response after 1-2 courses of chemotherapy (n=53).

| Therapy response                             | Total |      | Men  |      | Women |      |
|----------------------------------------------|-------|------|------|------|-------|------|
|                                              | Abs.  | %    | Abs. | %    | Abs.  | %    |
| Complete remission                           | 16    | 30.2 | 7    | 13.2 | 9     | 17   |
| Relapsed disease                             | 5     | 9.4  | 1    | 1.9  | 4     | 7.5  |
| Primary chemoresistance (refractory disease) | 32    | 60.4 | 17   | 32.1 | 15    | 28.3 |
| Total                                        | 53    | 100  | 25   | 47.2 | 28    | 52.8 |
